# Supplementary material
Source: ML conference proceedings conference paper supplement (https://proceedings.mlr.press/v38/roychowdhury15.html)
Supplement: Supplementary file [file roychowdhury15-supp.pdf]

---

# Gamma Processes, Stick-Breaking, and Variational Inference

---

**Anirban Roychowdhury**

Dept. of Computer Science and Engineering  
Ohio State University  
roychowdhury.7@osu.edu

**Brian Kulis**

Dept. of Computer Science and Engineering  
Ohio State University  
kulis@cse.ohio-state.edu

## Appendices

This document contains supplementary material for the submission ‘‘Gamma Processes, Stick-Breaking, and Variational Inference’’.

### A Variational inference details

To effectively perform variational inference, we re-write  $G$  as a single sum of weighted atoms, using indicator variables  $\{d_k\}$  for the rounds in which the atoms occur, similar to Paisley et al. (2010). We re-state our construction of the gamma CRM that we use for the inference algorithms:

$$G = \sum_{k=1}^{\infty} E_k e^{-T_k} \delta_{\omega_k}, \quad (1)$$

where  $E_k \stackrel{iid}{\sim} \text{Exp}(c)$ ,  $T_k \stackrel{iid}{\sim} \text{Gamma}(d_k, \alpha)$ ,  $\sum_{k=1}^{\infty} \mathbb{1}_{(d_k=r)} \stackrel{iid}{\sim} \text{Poisson}(\gamma)$ ,  $\omega_k \stackrel{iid}{\sim} \frac{1}{\gamma} H_0$ . Here  $d_k$  denotes the round in which atom  $k$  appears,

and may be defined as  $d_k \triangleq 1 + \sum_{i=1}^{\infty} \mathbb{I} \left\{ \sum_{j=1}^i C_j < k \right\}$ .

Conversely, given the round indicators  $\mathbf{d} = \{d_k\}$ , we can recover the round-specific atom counts as  $C_i = \sum_{k=1}^{\infty} \mathbb{I}(d_k = i)$ .

We place gamma priors on  $\alpha, \gamma$  and  $c$  :  $\alpha \sim \text{Gamma}(a_1, a_2)$ ,  $\gamma \sim \text{Gamma}(b_1, b_2)$ ,  $c \sim \text{Gamma}(c_1, c_2)$ . Denoting the data, the latent prior variables and the model hyperparameters by  $\mathcal{D}, \Pi$  and  $\Lambda$  respectively, the full likelihood may be written as  $P(\mathcal{D}, \Pi | \Lambda) =$

$$P(\mathcal{D}, \Pi_{-G} | \Pi_G, \Lambda) \cdot P(\alpha) \cdot P(\gamma) \cdot P(c) \cdot P(\mathbf{d} | \gamma) \cdot \prod_{k=1}^K P(E_k | c) \cdot P(T_k | d_k, \alpha) \cdot \prod_{n=1}^N P(z_{nk} | E_k, T_k),$$

with  $\Pi_{-G}$  denoting the set of the latent variables excluding those from the Poisson-Gamma prior. The distribution of  $\mathbf{d}$

is given by  $P(\mathbf{d} | \gamma) =$

$$\prod_{r=1}^{\infty} \frac{\gamma^{\sum_k \mathbb{1}_{(d_k=r)}}}{(\sum_k \mathbb{1}_{(d_k=r)})!} \cdot \exp \left\{ -\gamma \mathbb{I} \left( \sum_{r'=r}^{\infty} \sum_{k=1}^{\infty} \mathbb{1}_{(d_k=r')} > 0 \right) \right\}.$$

See Paisley et al. (2011) for discussions on how to approximate some of these factors in the variational algorithm.

#### A.1 The Variational Prior Distribution

Mean-field variational inference involves minimizing the KL divergence between the model posterior, and a suitably constructed *variational* distribution which is used as a more tractable alternative to the actual posterior distribution. To that end, we propose a fully-factorized variational distribution on the Poisson-Gamma prior as follows:

$$Q = q(\alpha) \cdot q(\gamma) \cdot q(c) \cdot \prod_{k=1}^K q(E_k) \cdot q(T_k) \cdot q(d_k) \cdot \prod_{n=1}^N q(z_{nk}),$$

where  $q(E_k) \sim \text{Gamma}(\xi'_k, \epsilon'_k)$ ,  $q(T_k) \sim \text{Gamma}(u'_k, v'_k)$ ,  $q(\alpha) \sim \text{Gamma}(\kappa_1, \kappa_2)$ ,  $q(\gamma) \sim \text{Gamma}(\tau_1, \tau_2)$ ,  $q(c) \sim \text{Gamma}(\rho_1, \rho_2)$ ,  $q(z_{nk}) \sim \text{Poisson}(\lambda_{nk})$ ,  $q(d_k) \sim \text{Mult}(\varphi_k)$ .

The *evidence lower bound* (ELBO) may therefore be written as  $\mathcal{L} = \mathbb{E}_Q \log P(\mathcal{D}, \Pi | \Lambda) - \mathbb{E}_Q \log Q$ , with the relevant distributions described above.

#### A.2 Variational parameter updates

We first re-state the closed form updates for the variational distributions on the prior variables. The updates for the hy-

perparameters in  $q(E_k)$ ,  $q(\alpha)$ ,  $q(c)$  and  $q(\gamma)$  are as follows:

$$\begin{aligned}\xi'_k &= \sum_{n=1}^N \mathbb{E}_Q(z_{nk}) + 1, \quad \epsilon'_k = \mathbb{E}(c) + N \times \mathbb{E}_Q[e^{-T_k}], \\ \kappa_1 &= \sum_{k=1}^K \sum_{r \geq 1} r \varphi_k(r) + a_1, \quad \kappa_2 = \sum_{k=1}^K \mathbb{E}_Q(T_k) + a_2, \\ \rho_1 &= c_1 + K, \quad \rho_2 = \sum_{k=1}^K \mathbb{E}_Q(E_k) + c_2, \\ \tau_1 &= b_1 + K, \quad \tau_2 = \sum_{r \geq 1} \left\{ 1 - \prod_{k=1}^K \sum_{r'=1}^{r-1} \varphi_k(r') \right\} + b_2.\end{aligned}$$

The updates for the multinomial probabilities in  $q(d_k)$  are given by:

$$\begin{aligned}\varphi_k(r) &\propto \exp\{r \mathbb{E}_Q(\log \alpha) - \log \Gamma(r) + (r-1) \mathbb{E}_Q(\log T_k) - \\ &\quad \zeta \cdot \sum_{i \neq k} \varphi_i(r) - \mathbb{E}_Q(\gamma) \sum_{j=2}^r \prod_{k' \neq k} \sum_{r'=1}^{j-1} \varphi_{k'}(r')\}.\end{aligned}$$

Next we describe the gradient ascent updates on  $q(T_k)$  and the updates on  $q(\Pi_{-G})$  and  $q(z_{nk})$ .

The gradients for the two variational parameters in  $q(T_k)$  are:

$$\begin{aligned}\frac{\partial \mathcal{L}}{\partial u'_k} &= \sum_{r \geq 1} (r-1) \varphi_k(r) \psi'(u'_k) - \frac{\mathbb{E}_Q(\alpha)}{u'_k} \\ &\quad - \sum_{n=1}^N \mathbb{E}_Q(E_k) \left( \frac{u'_k}{u'_k + 1} \right)^{u'_k} \cdot \log \left( \frac{u'_k}{u'_k + 1} \right) \\ &\quad - \sum_{n=1}^N \mathbb{E}_Q(z_{nk}) \frac{1}{u'_k} - (u'_k - 1) \psi'(u'_k) - 1 \\ \frac{\partial \mathcal{L}}{\partial v'_k} &= - \sum_{r \geq 1} (r-1) \varphi_k(r) \frac{1}{v'_k} + \mathbb{E}_Q(\alpha) \frac{u'_k}{(v'_k)^2} \\ &\quad - \sum_{n=1}^N \mathbb{E}_Q(E_k) u'_k \frac{v'_k^{u'_k - 1}}{(v'_k + 1)^{u'_k + 1}} \\ &\quad + \sum_{n=1}^N \mathbb{E}_Q(z_{nk}) \frac{u'_k}{(v'_k)^2} - \frac{1}{v'_k}.\end{aligned}$$

For the topic modeling problems, we model the observed vocabulary-vs-document corpus count matrix  $D$  as  $D \sim \text{Poi}(\Phi Z)$ , where the  $V \times K$  matrix  $\Phi$  models the factor loadings, and the  $K \times N$  matrix  $Z$  models the actual factor counts in the documents. We put the  $K$ -truncated Poisson-Gamma prior on  $Z$ , and put a Dirichlet( $\beta_1, \dots, \beta_V$ ) prior on the columns of  $\Phi$ .

The variational distribution  $Q$  consequently gets a Dirichlet( $\Phi | \{\mathbf{b}\}_k$ ) distribution multiplied to it, where  $\mathbf{b} = (b_1, \dots, b_V)$  are the variational Dirichlet hyperparameters.

This setup does not immediately lend itself to closed form updates for the  $b$ -s, so we resort to gradient ascent. The gradient of the ELBO with respect to each variational hyperparameter is

$$\begin{aligned}\frac{\partial \mathcal{L}}{\partial b_{vk}} &= -\mathbb{E}_Q(z_{nk}) \cdot \frac{\sum_v b_{vk} - b_{vk}}{(\sum_v b_{vk})^2} + \psi'(b_{vk}) \\ &\quad \cdot \left( \beta_v - b_{vk} + \sum_n d_{vn} \right) + \psi' \left( \sum_v b_{vk} \right) \times \\ &\quad \left( \sum_v b_{vk} - V - \beta_v - \sum_n d_{vn} + 1 \right).\end{aligned}$$

In practice however we found a closed-form update facilitated by a simple lower bound on the ELBO to converge faster. We describe the update here. First note that the part of the ELBO relevant to a potential closed form variational update of  $\phi_{vk}$  can be written as

$$\mathcal{L} = -\phi_{vk} \cdot \sum_n \mathbb{E}_Q(z_{nk}) + \sum_n d_{vn} \cdot \log \phi_{vk} + \dots,$$

which can then be lower bounded as

$$\mathcal{L} \geq \log \phi_{vk} \cdot \left( -\sum_n \mathbb{E}_Q(z_{nk}) + \sum_n d_{vn} \right) + \dots$$

This allows us to analytically update  $b_{vk}$  as  $b_{vk} = -\sum_n \mathbb{E}_Q(z_{nk}) + \sum_n d_{vn} + \beta_v$ . This frees us from having to choose appropriate corpus-specific initializations and learning rates for the  $\Phi$ s.

A similar lower bound on the ELBO allows us to update the variational parameters of  $q(z_{nk})$  as  $\lambda_{nk} = -1 - \sum_v d_{vn} + \mathbb{E}_Q(\log E_k) + \mathbb{E}_Q(T_k)$ .

## B Variational inference using denormalized DP construction

We describe our algorithm derived from the simpler construction of the Gamma process by multiplying the stick-breaking construction of the Dirichlet process by a Gamma random variable. The construction can be written as:

$$G = G_0 \sum_{i=1}^{\infty} V_i \prod_{j=1}^{i-1} (1 - V_j) \delta_{\omega_i},$$

where  $G_0 \sim \text{Gamma}(\alpha, c)$ ,  $V_i \stackrel{iid}{\sim} \text{Beta}(1, \alpha)$ ,  $\omega_i \stackrel{iid}{\sim} H_0$ .

We use an equivalent form of the construction that is similar to the one used above :

$$G = G_0 \sum_{k=1}^{\infty} V_k e^{-T_k} \delta_{\omega_k},$$

where  $G_0 \sim \text{Gamma}(\alpha, c)$ ,  $V_k \stackrel{iid}{\sim} \text{Beta}(1, \alpha)$ ,  $T_k \stackrel{iid}{\sim} \text{Gamma}(k-1, \alpha)$ ,  $\omega_i \stackrel{iid}{\sim} H_0$ .

As before, we place gamma priors on  $\alpha$  and  $c$  :  $\alpha \sim \text{Gamma}(a_1, a_2)$ ,  $c \sim \text{Gamma}(c_1, c_2)$ .

Our variational distribution for this prior is as follows:

$$Q = q(G_0) \cdot q(\alpha) \cdot q(c) \cdot \prod_{k=1}^K q(V_k) \cdot q(T_k) \cdot \prod_{n=1}^N q(z_{nk}),$$

where  $q(G_0) \sim \text{Gamma}(g_1, g_2)$ ,  $q(V_k) \sim \text{Beta}(\nu_{k1}, \nu_{k2})$ ,  $q(T_k) \sim \text{Gamma}(t_{k1}, t_{k2})$ ,  $q(\alpha) \sim \text{Gamma}(\kappa_1, \kappa_2)$ ,  $q(c) \sim \text{Gamma}(\rho_1, \rho_2)$ ,  $q(z_{nk}) \sim \text{Poisson}(\lambda_{nk})$ .

The closed form updates for the variational hyperparameters for  $\alpha$ ,  $G_0$ , and  $c$  are as follows:

$$\begin{aligned} \kappa_1 = a_1, \quad \kappa_2 = a_2 - \mathbb{E}_Q(\log G_0) - \sum_k \mathbb{E}_Q(\log(1 - V_k)) \\ + \sum_k \mathbb{E}_Q(T_k), \end{aligned}$$

$$\begin{aligned} g_1 = \alpha + \sum_{n=1}^N \sum_k \mathbb{E}_Q(z_{nk}), \quad g_2 = N \cdot \sum_k \mathbb{E}_Q(V_k e^{-T_k}), \\ \rho_1 = c_1, \quad \rho_2 = c_2 + \mathbb{E}_Q(G_0). \end{aligned}$$

The updates for  $q(V_k)$  and  $q(T_k)$  are not closed form, necessitating gradient ascent steps. The gradients for the variational parameters in  $q(V_k)$  are:

$$\begin{aligned} \frac{\partial \mathcal{L}}{\partial \nu_{k1}} = \psi'(\nu_{k1} + \nu_{k2}) \left[ \nu_{k1} + \nu_{k2} - \alpha - \sum_{n=1}^N \mathbb{E}_Q(z_{nk}) - 1 \right] \\ + \psi'(\nu_{k1}) \cdot \left[ \sum_{n=1}^N \mathbb{E}_Q(z_{nk}) - \nu_{k1} + 1 \right] \\ - N \cdot \mathbb{E}_Q(G_0 e^{-T_k}) \frac{\nu_{k2}}{\nu_{k1} + \nu_{k2}} \end{aligned}$$

$$\begin{aligned} \frac{\partial \mathcal{L}}{\partial \nu_{k2}} = \psi'(\nu_{k1} + \nu_{k2}) \left[ \nu_{k1} + \nu_{k2} - \alpha - \sum_{n=1}^N \mathbb{E}_Q(z_{nk}) - 1 \right] \\ - N \cdot \mathbb{E}_Q(G_0 e^{-T_k}) \frac{\nu_{k1}}{\nu_{k1} + \nu_{k2}} + \psi'(\nu_{k2}) \cdot [\alpha - \nu_{k2}]. \end{aligned}$$

The gradients for the variational parameters in  $q(T_k)$  are:

$$\begin{aligned} \frac{\partial \mathcal{L}}{\partial t_{k1}} = 1 + \psi'(t_{k1}) \cdot (k - t_{k1} - 1) - \\ \log t_{k2} - \frac{1}{t_{k2}} \left( \alpha + \sum_{n=1}^N \mathbb{E}_Q(z_{nk}) \right) \\ - N \cdot \mathbb{E}_Q(G_0 V_k) \cdot \frac{\partial}{\partial t_{k1}} \left( \frac{t_{k2}}{t_{k2} + 1} \right)^{t_{k1}} \end{aligned}$$

$$\begin{aligned} \frac{\partial \mathcal{L}}{\partial t_{k2}} = \frac{t_{k1}}{t_{k2}^2} \left( \alpha + \sum_{n=1}^N \mathbb{E}_Q(z_{nk}) \right) - \frac{1}{t_{k2}} (k - 1) \\ - N \cdot \mathbb{E}_Q(G_0 V_k) \cdot \frac{\partial}{\partial t_{k2}} \left( \frac{t_{k2}}{t_{k2} + 1} \right)^{t_{k1}} \end{aligned}$$

## C Markov chain Monte Carlo sampling details

We re-write the construction of the Poisson-Gamma prior:

$$G = \sum_{k=1}^{\infty} E_k e^{-T_k} \delta_{\omega_k},$$

$$E_k \stackrel{iid}{\sim} \text{Exp}(c), \quad T_k \stackrel{iid}{\sim} \text{Gamma}(d_k, \alpha), \quad \sum_{k=1}^{\infty} \mathbb{1}_{(d_k=r)} \stackrel{iid}{\sim}$$

$\text{Pois}(\gamma)$ ,  $\omega_k \stackrel{iid}{\sim} \frac{1}{\gamma} H_0$ . We put improper priors on  $\alpha$  and  $c$ , and a noninformative Gamma prior on  $\gamma$ . The indicator counts are given by  $Z_{nk} \sim \text{Pois}(g_k)$ , where  $g_k = E_k e^{-T_k}$ . To avoid sampling the atom weights  $E_k$  and  $T_k$ , we integrate them out using Monte Carlo techniques in the sampling steps for the prior.

### C.1 Sampling the round indicators

The conditional posterior for the round indicators  $\mathbf{d} = \{d_k\}_{k=1}^K$  can be written as

$$\begin{aligned} p(d_k = i | \{d_l\}_{l=1}^{k-1}, \{Z_{nk}\}_{n=1}^N, \alpha, c, \gamma) \\ \propto p(\{Z_{nk}\}_{n=1}^N | d_k = i, \alpha, c) p(d_k = i | \{d_l\}_{l=1}^{k-1}). \end{aligned}$$

For the first factor, we collapse out the stick-breaking weights and approximate the resulting integral using Monte-Carlo techniques as follows:

$$\begin{aligned} p(\{Z_{nk}\}_{n=1}^N | d_k = i, \alpha, c) = \int_{[0, \infty]^i} \prod_{n=1}^N \text{Pois}(Z_{nk} | g_k) dG \\ \approx \frac{1}{S} \sum_{s=1}^S \prod_{n=1}^N \text{Pois}(Z_{nk} | g_k^{(s)}), \end{aligned}$$

where  $g_k^{(s)} = E_k^{(s)} e^{-T_k^{(s)}} \triangleq V_{k,d_k}^{(s)} \prod_{l=1}^{d_k} (1 - V_{kl}^{(s)})$ . Here  $S$  is the number of simulated samples from the integral over the stick-breaking weights. We take  $S = 1000$  in our experiments.

The second factor is the same as Paisley et al. (2010):

$$\begin{aligned} p(d_k = d | \gamma, \{d_l\}_{l=1}^{k-1}) = \\ \begin{cases} 0 & \text{if } d < d_{k-1} \\ \frac{1 - \sum_{t=1}^{d_{k-1}} \text{Pois}(t|\gamma)}{1 - \sum_{t=1}^{d_{k-1}-1} \text{Pois}(t|\gamma)} & \text{if } d = d_{k-1} \\ \left( 1 - \frac{1 - \sum_{t=1}^{d_{k-1}} \text{Pois}(t|\gamma)}{1 - \sum_{t=1}^{d_{k-1}-1} \text{Pois}(t|\gamma)} \right) (1 - \text{Pois}(0|\gamma)) \text{Pois}(0|\gamma)^{d-d_{k-1}} & \text{if } d = d_{k-1} + h \end{cases} \end{aligned}$$

Here  $D_k \triangleq \sum_{j=1}^k \mathbb{I}(d_j = d_k)$ . Normalizing the product of these two factors over all  $i$  is infeasible, so we evaluate this product for increasing  $i$  till it drops below  $10^{-2}$ , and normalize over the gathered values.

## C.2 Sampling the factor variables

Here we consider the Poisson factor modeling scenario that we use to model vocabulary-document count matrices. Recall that a  $V \times N$  count matrix  $D$  is modeled as  $D = \text{Poi}(\Phi Z)$ , where the  $V \times K$  matrix  $\Phi$  models the factor loadings, and the  $K \times N$  matrix  $Z$  models the actual factor counts in the documents. We put the Poisson-Gamma prior on  $Z$  and symmetric Dirichlet( $\beta_1, \dots, \beta_V$ ) priors on the columns of  $\Phi$ . The sampling steps for  $\Phi$  and  $Z$  are described next.

### C.2.1 Sampling $\Phi$

First note that the elements of the count matrix are modeled as  $d_{vn} = \text{Poi}\left(\sum_{k=1}^K \phi_{vk} z_{kn}\right)$ , which can be equivalently written as  $d_{vn} = \sum_{k=1}^K d_{vkn}$ ,  $d_{vkn} = \text{Poi}(\phi_{vk} z_{kn})$ . Standard manipulations then allow us to sample the  $d_{vkn}$ 's from  $\text{Mult}(d_{vn}; p_{v1n}, \dots, p_{vKn})$  where  $p_{vkn} = \phi_{vk} z_{kn} / \sum_k \phi_{vk} z_{kn}$ .

Now we have  $\phi_k \sim \text{Dirichlet}(\beta_1, \dots, \beta_V)$ . Using standard relationships between Poisson and multinomial distributions, we can derive the posterior distribution of the  $\phi_k$ 's as  $\text{Dirichlet}(\beta_1 + d_{1k}, \dots, \beta_V + d_{Vk})$ , where  $d_{vk} = \sum_{n=1}^N d_{vkn}$ .

### C.2.2 Sampling $Z$

In our algorithm we sample each  $z_{nk}$  conditioned on all the other variables in the model; therefore the conditional posterior distribution can be written as

$$\begin{aligned} p(z_{nk} | D, \Phi, Z_{n,-k}, \mathbf{d}, \alpha, c, \gamma) &= p(D | Z_n, \Phi) p(z_{nk} | \mathbf{d}, \alpha, c, Z_{n,-k}) \\ &= \prod_{v=1}^V \text{Poi}\left(d_{vn} \mid \sum_{k=1}^K \phi_{vk} z_{kn}\right) \frac{p(Z_n | \mathbf{d}, \alpha, c)}{p(Z_{n,-k} | \mathbf{d}, \alpha, c)}. \end{aligned}$$

The distributions in both the numerator and denominator of the second factor can be sampled from using the Monte Carlo techniques described above, by integrating out the stick-breaking weights.

## C.3 Sampling hyperparameters

As mentioned above, we put a noninformative Gamma prior on  $\gamma$  and improper (1) priors on  $\alpha$  and  $c$ . The posterior sampling steps are described below:

### C.3.1 Sampling $\gamma$

Given the round indicators  $\mathbf{d} = \{d_k\}$ , we can recover the round-specific atom counts as described above. Then the conjugacy between the Gamma prior on  $\gamma$  and the Poisson distribution of  $C_i$  gives us a closed form posterior distribution for  $\gamma$ :  $p(\gamma | \mathbf{d}, Z, \alpha, c) = \text{Gamma}(\gamma | a + \sum_{i=1}^K C_i, b + d_K)$ .

### C.3.2 Sampling $\alpha$

The conditional posterior distribution of  $\alpha$  may be written as:

$$p(\alpha | Z, \mathbf{d}, c) \propto p(\alpha) \prod_{n=1}^N \prod_{k=1}^K p(Z | \mathbf{d}, \alpha, c).$$

We calculate the posterior distribution of  $Z$  using Monte Carlo techniques as described above. Then we discretize the search space for  $\alpha$  around its current values as  $(\alpha_{cur} + t\Delta\alpha)_{t=L}^U$ , where the lower and upper bounds  $L$  and  $U$  are chosen so that the unnormalized posterior falls below  $10^{-2}$ . The search space is also clipped below at 0.  $\alpha$  is then drawn from a multinomial distribution on the search values after normalization.

### C.3.3 Sampling $c$

We sample  $c$  in exactly the same way as  $\alpha$ . We first write the conditional posterior as

$$p(c | Z, \mathbf{d}, \alpha) \propto p(c) \prod_{n=1}^N \prod_{k=1}^K p(Z | \mathbf{d}, \alpha, c).$$

The search space ( $c > 0$ ) is then discretized using appropriate upper and lower bounds as above, and  $Z$  is sampled using Monte Carlo techniques.  $c$  is then drawn from a multinomial distribution on the search values after normalization.

## References

- Paisley, J., Carin, L., and Blei, D. M. (2011). Variational Inference for Stick-Breaking Beta Process Priors. In *International Conference on Machine Learning*.
- Paisley, J., Zaas, A., Woods, C. W., Ginsburg, G. S., and Carin, L. (2010). A Stick-Breaking Construction of the Beta Process. In *International Conference on Machine Learning*.
